# Supplementary material for: On the CN−⋯K coordination modes in Kn[M6−n(CN)6]·xH2O: first evidence of CN−⋯K electron-deficient bonding
Source: Royal Society of Chemistry journal article supplement (doi:10.1039/d0dt04019c), 2021-01-01
Supplement: d0dt04019c1.pdf [file d0dt04019c1.pdf]

## Supplementary Information

### On the CN<sup>-</sup>⋯K coordination modes in K<sub>n</sub>[M<sup>6-n</sup>(CN)<sub>6</sub>]·xH<sub>2</sub>O: First evidence of CN<sup>-</sup>⋯K electron-deficient bonding

Manuel Avila <sup>a</sup>, Lucero Torres <sup>a</sup>, Ana L. Montero-Alejo <sup>b</sup>, Leslie Reguera <sup>\*a,c</sup> and Edilso Reguera <sup>\*a</sup>

- a)* Instituto Politécnico Nacional, Centro de Investigación en Ciencia Aplicada y Tecnología Avanzada, U. Legaria, Ciudad México, México; E-mail: [edilso.reguera@gmail.com](mailto:edilso.reguera@gmail.com)
- b)* Departamento de Física, Facultad de Ciencias Naturales, Matemática y del Medio Ambiente (FCNMM), Universidad Tecnológica Metropolitana, Santiago, Chile
- c)* Universidad de La Habana, Facultad de Química, La Habana, Cuba; E-mail: [lesliereguera2005@gmail.com](mailto:lesliereguera2005@gmail.com)

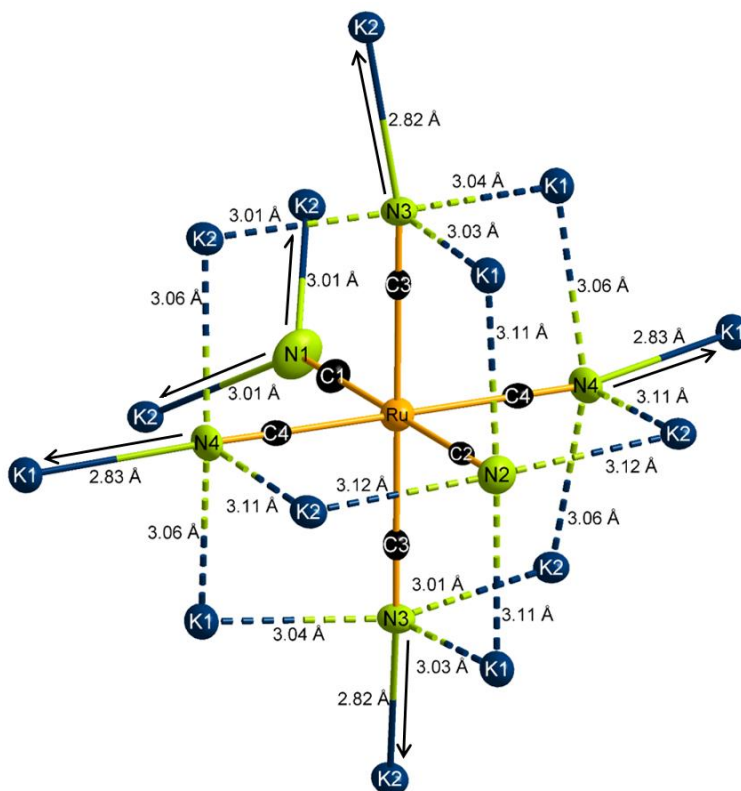

**Figure S1.** Network of interactions between K atoms and the N end of the CN ligands in  $K_4[Ru(CN)_6] \cdot 3H_2O$

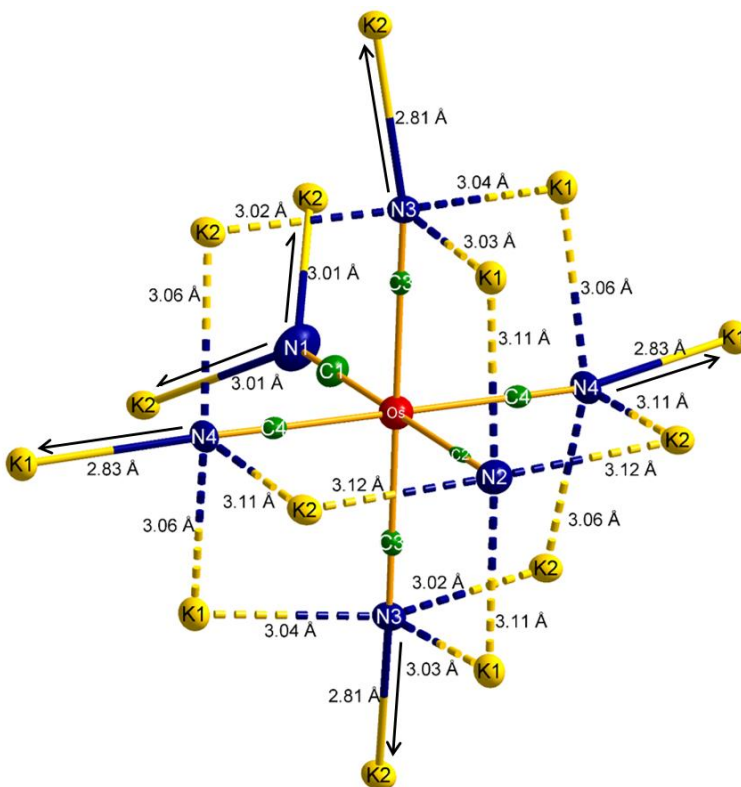

**Figure S2.** Network of interactions between K atoms and the N end of the  $CN^-$  ligands in  $K_4[Os(CN)_6] \cdot 3H_2O$

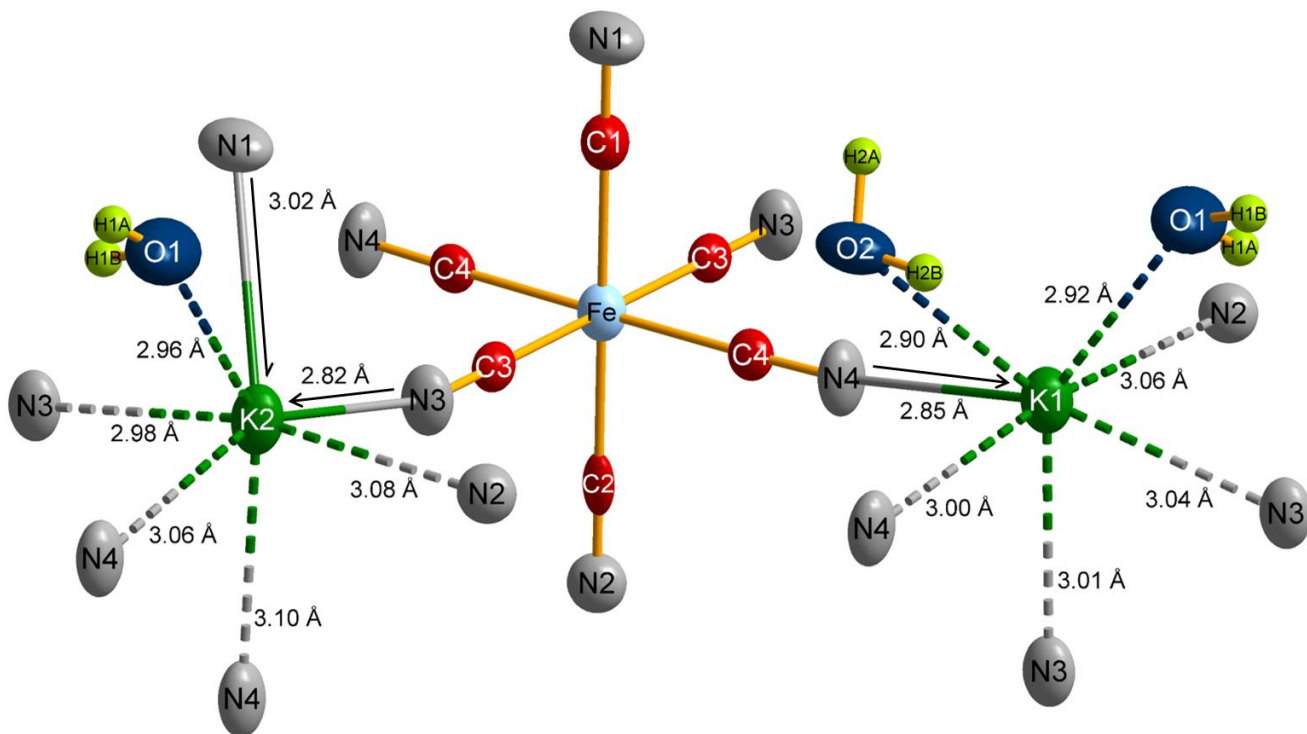

Figure S3. Coordination environment for Fe and K atoms in  $K_4[Fe(CN)_6] \cdot 3H_2O$ .

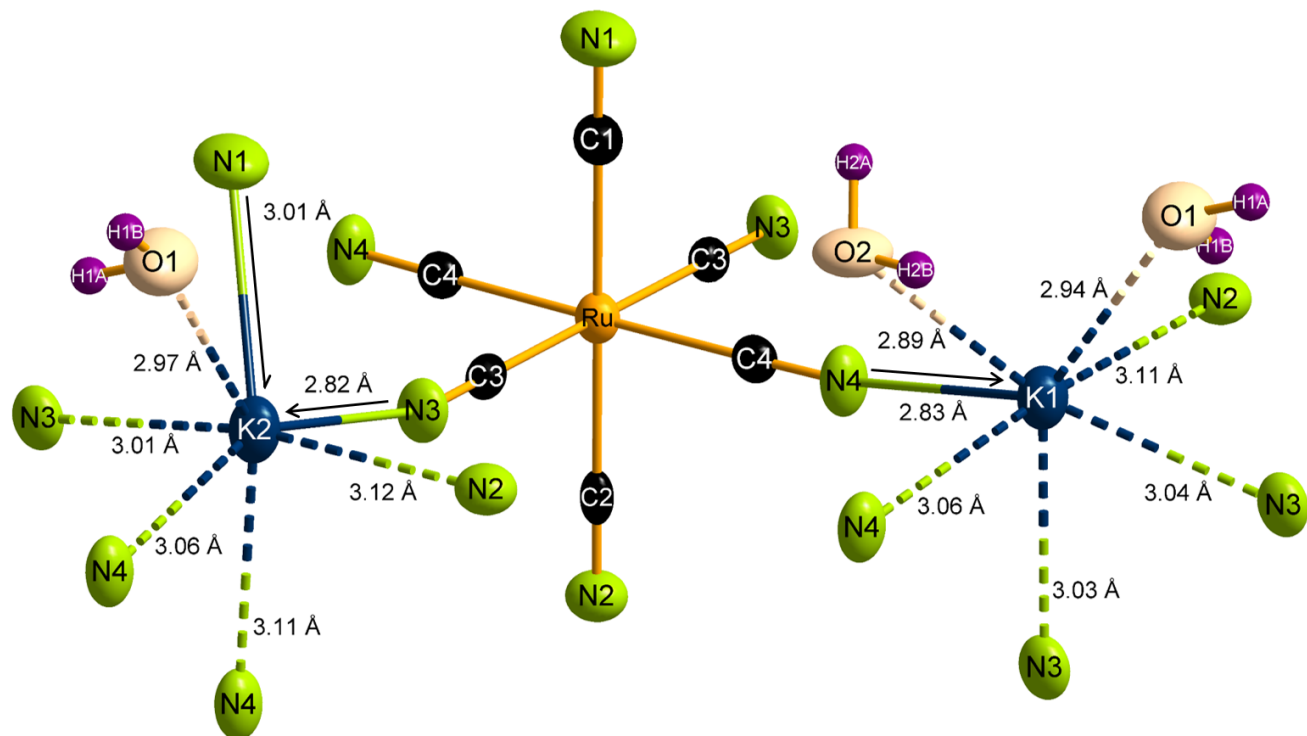

Figure S4. Coordination environment for Ru and K atoms in  $K_4[Ru(CN)_6] \cdot 3H_2O$ .

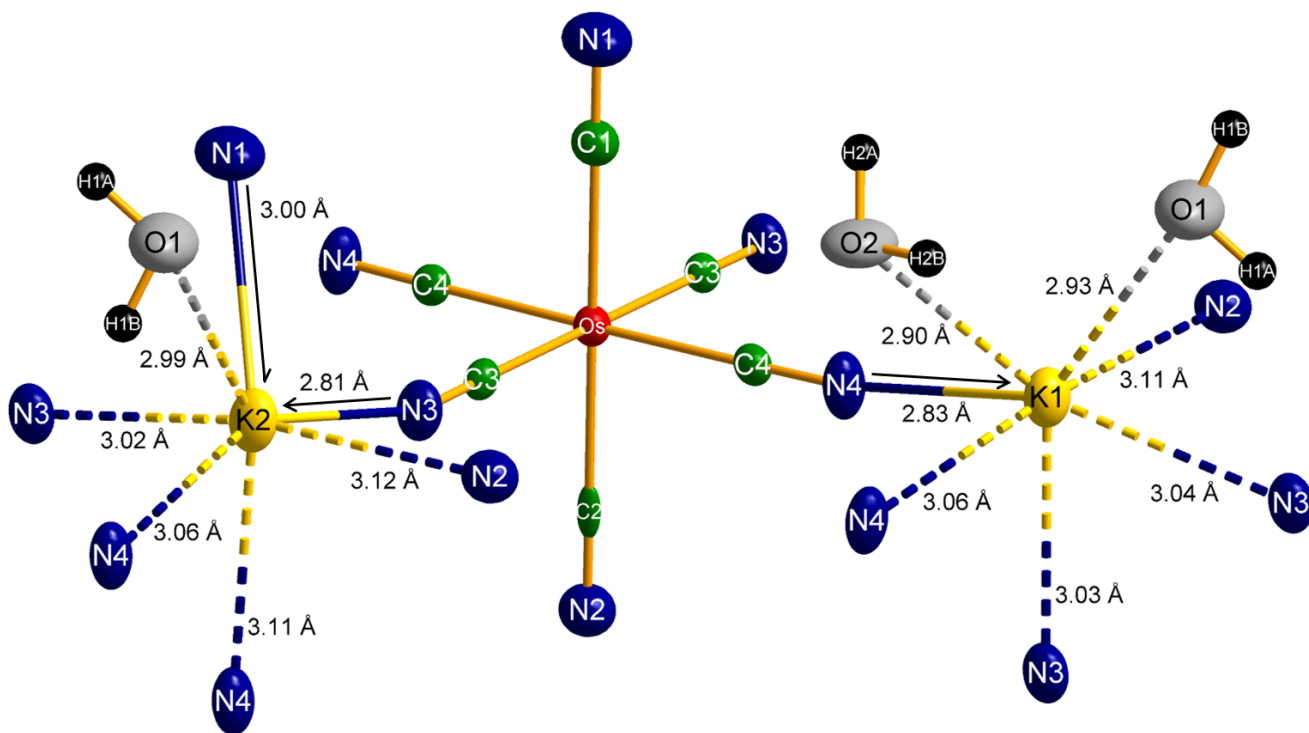

**Figure S5.** Coordination environment for Os and K atoms in  $K_4[Os(CN)_6] \cdot 3H_2O$

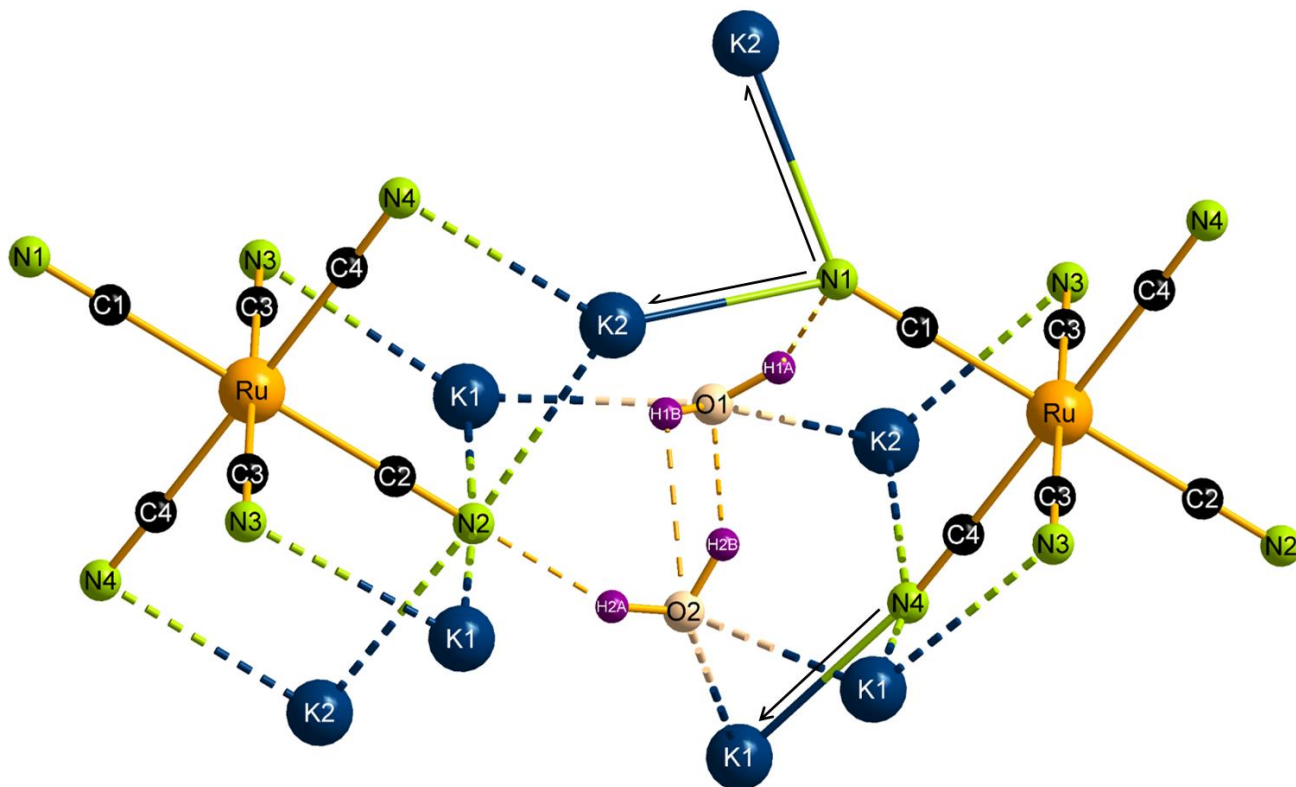

**Figure S6.** Network of hydrogen bonds and of N-K interactions responsible for large range order in  $K_4[Ru(CN)_6] \cdot 3H_2O$ .

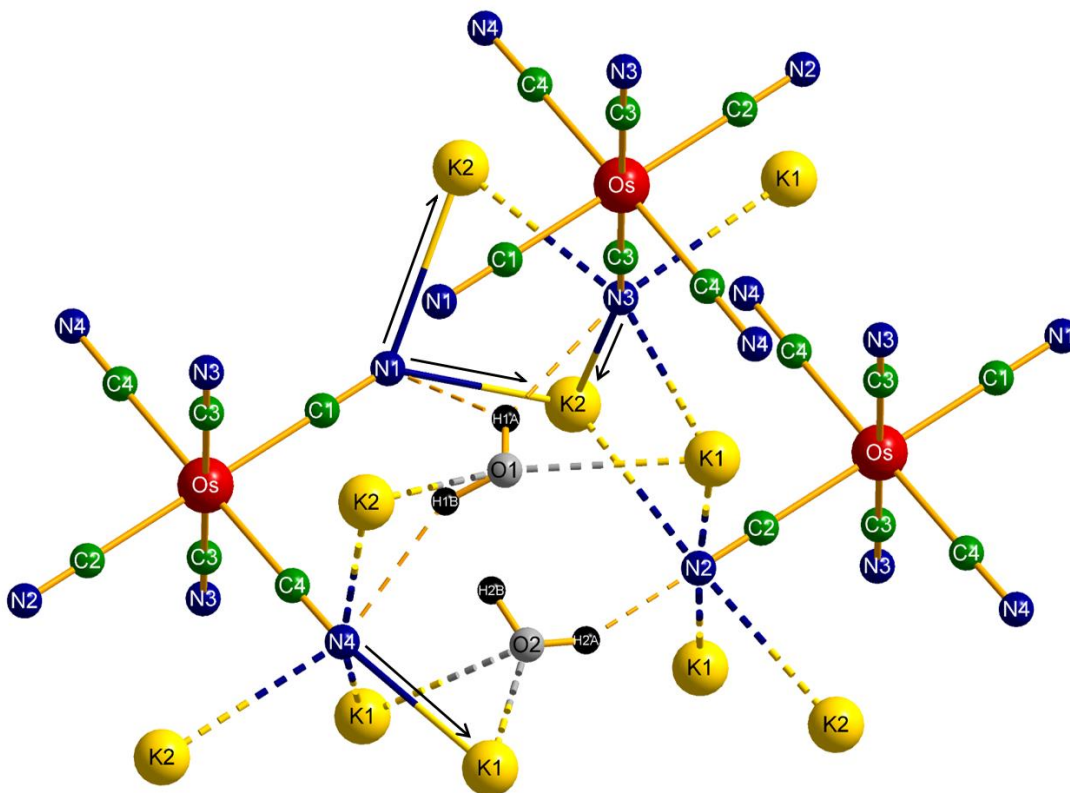

**Figure S7.** Network of hydrogen bonds and of N-K interactions responsible for large range order in  $K_4[Os(CN)_6] \cdot 3H_2O$

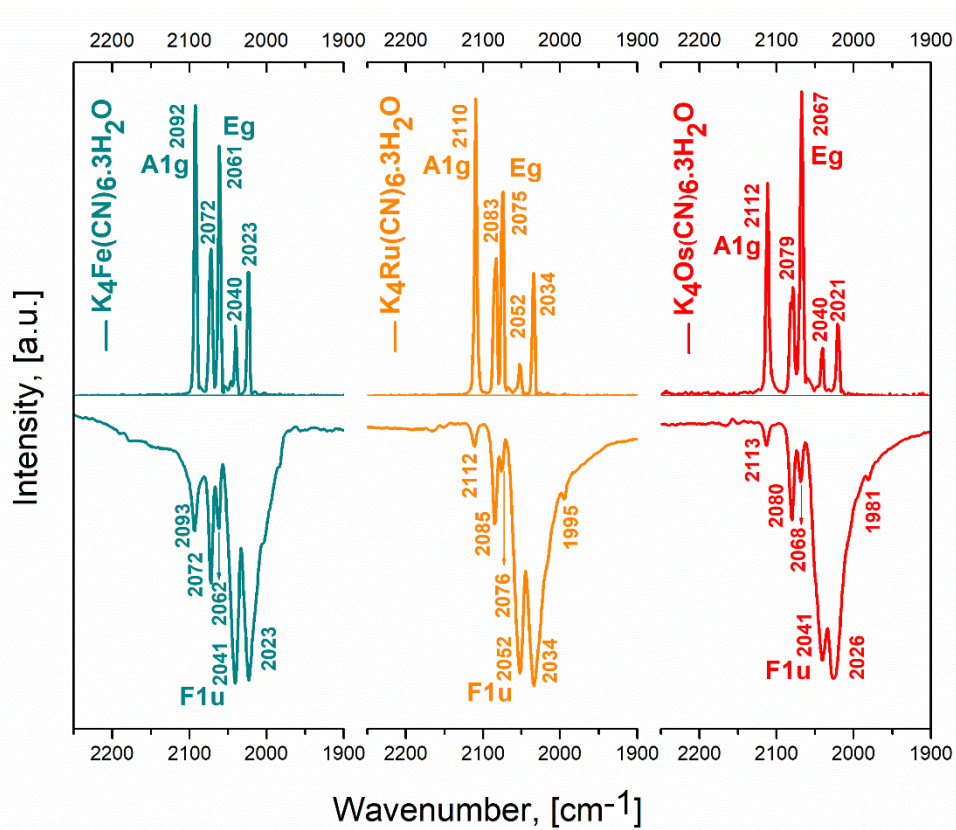

**Figure S8.**  $\nu(CN)$  spectral region for the IR (below) and Raman (above) spectra for  $K_4[M(CN)_6] \cdot 3H_2O$  with  $M = Fe, Ru, Os$



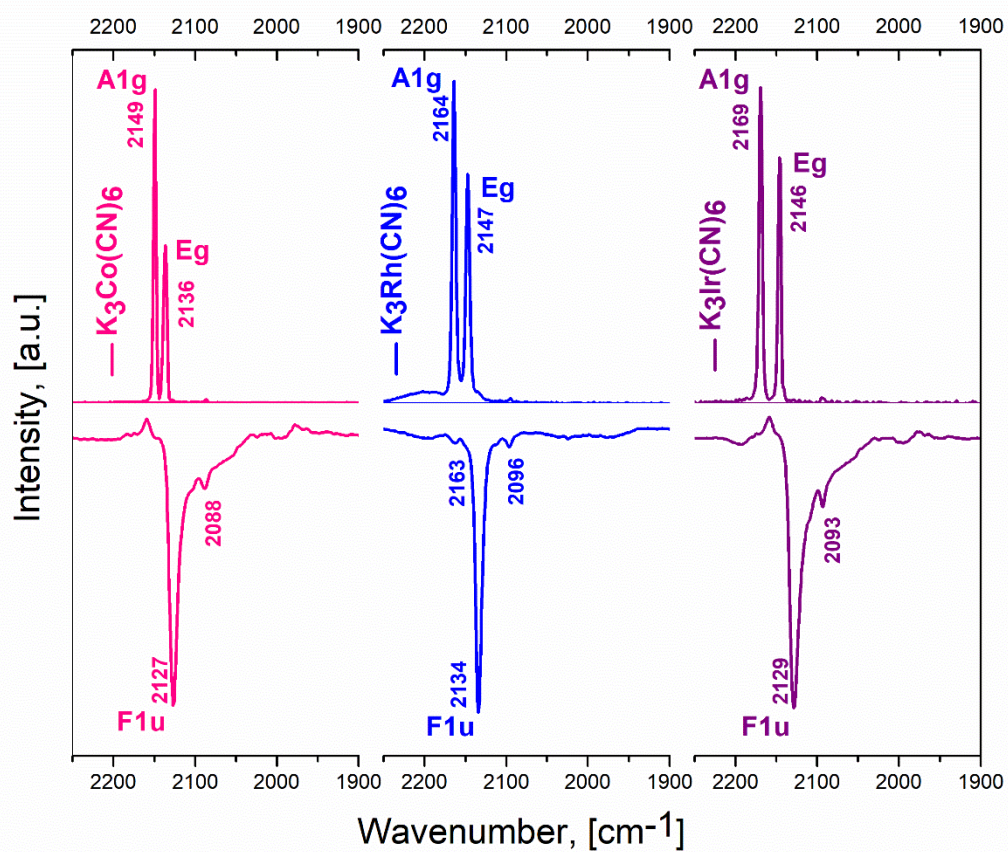

Figure S9.  $\nu(\text{CN})$  spectral region for the IR (below) and Raman (above) spectra for  $\text{K}_3[\text{M}(\text{CN})_6]$  with  $\text{M} = \text{Co}, \text{Rh}, \text{Ir}$

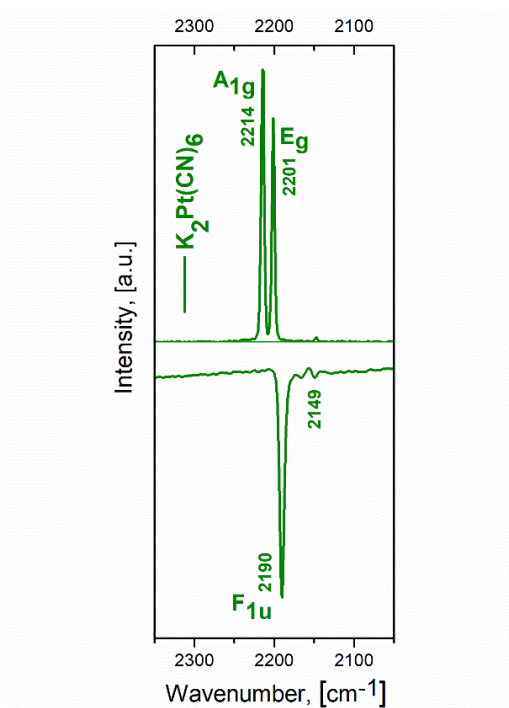

Figure S10.  $\nu(\text{CN})$  spectral region for the IR (below) and Raman (above) spectra for  $\text{K}_2[\text{Pt}(\text{CN})_6]$

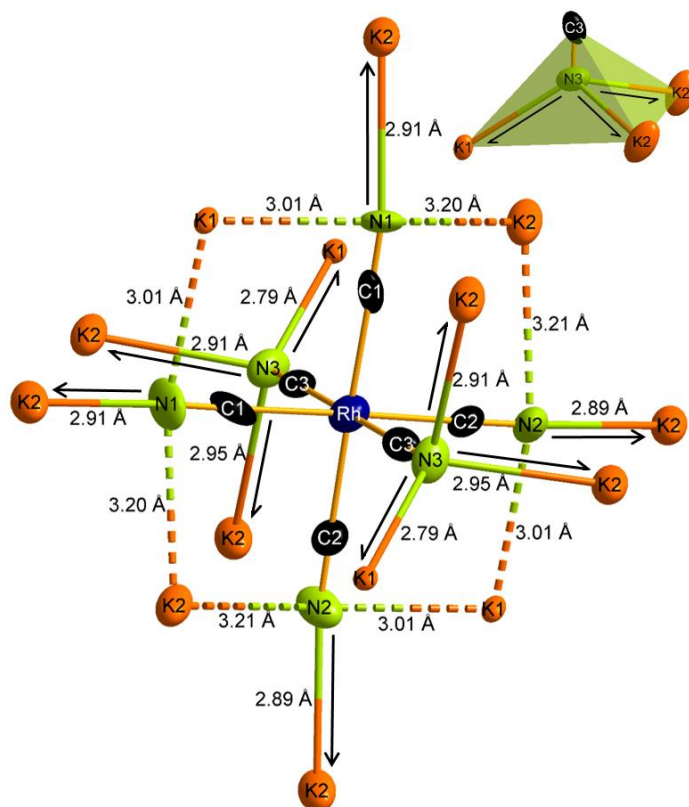

**Figure S11.** Network of interactions between K atoms and the N end of the CN<sup>-</sup> ligands in K<sub>3</sub>[Rh(CN)<sub>6</sub>]

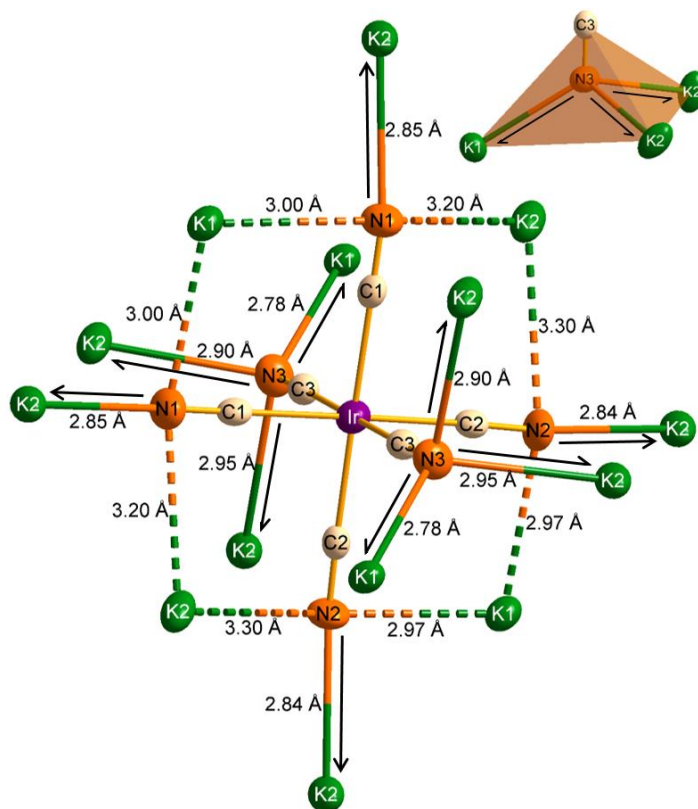

**Figure S12.** Network of interactions between K atoms and the N end of the CN<sup>-</sup> ligands in K<sub>3</sub>[Ir(CN)<sub>6</sub>]

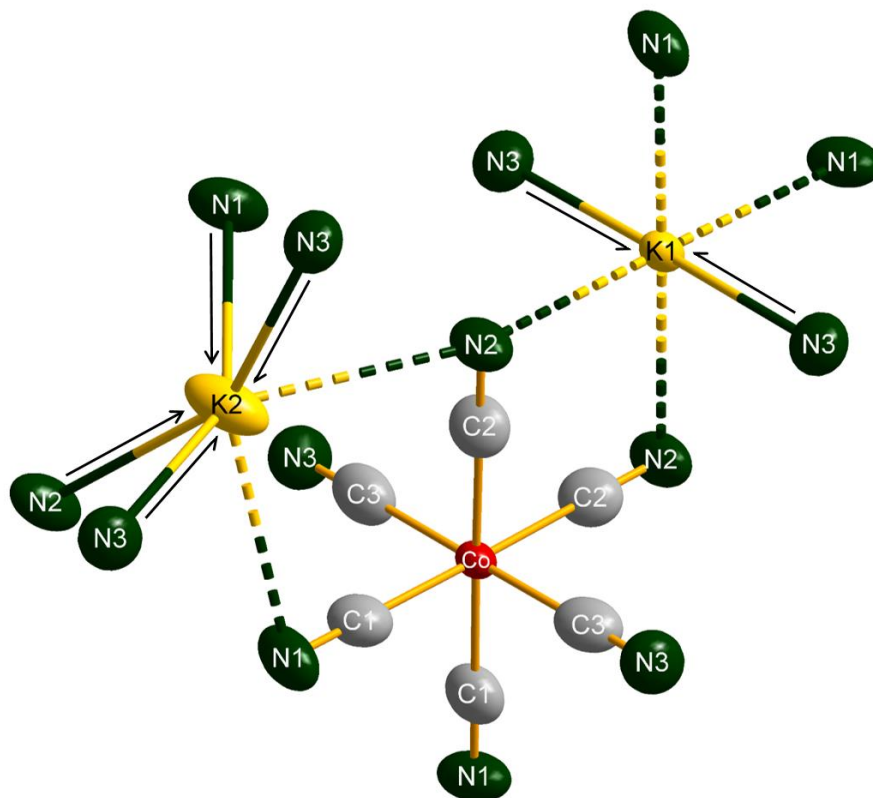

Figure S13. Coordination environment for Co and K atoms in  $K_3[Co(CN)_6]$

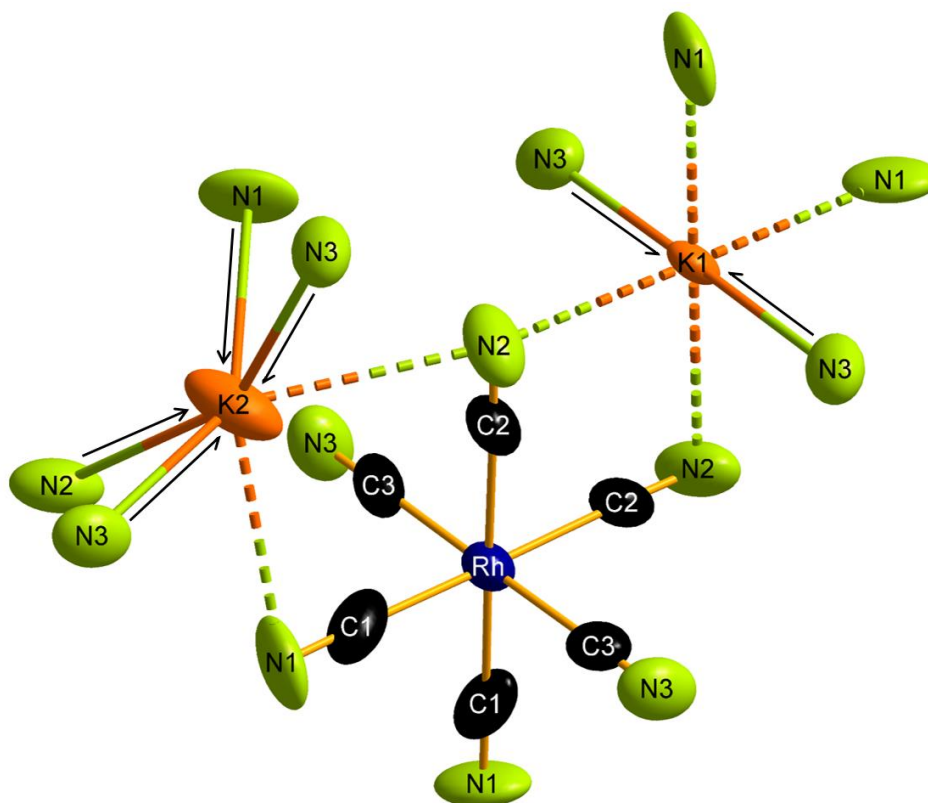

Figure S14. Coordination environment for Rh and K atoms in  $K_3[Rh(CN)_6]$



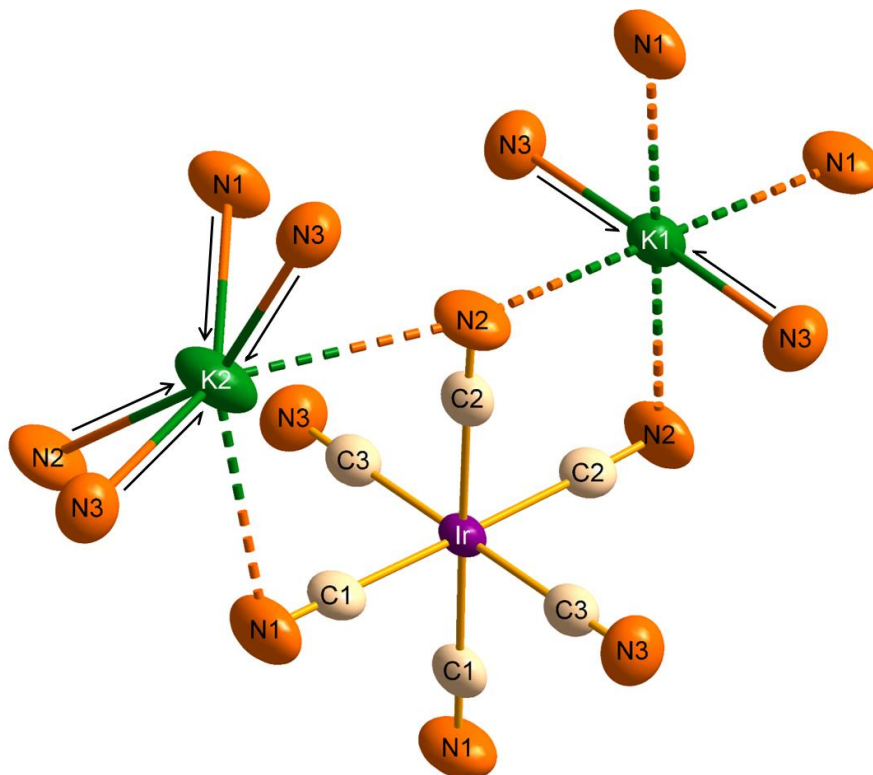

Figure S15. Coordination environment for Ir and K atoms in  $K_3[Ir(CN)_6]$

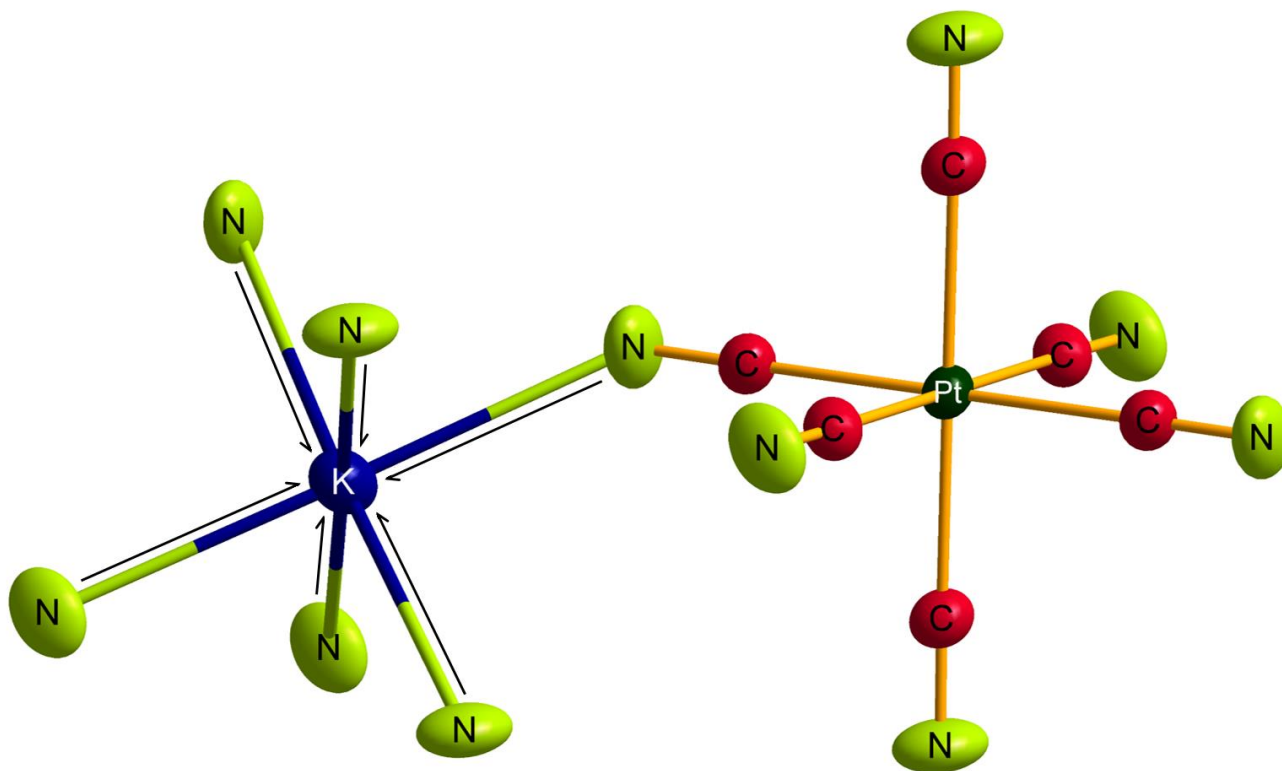

Figure S16. Coordination environment for Pt and K atoms in  $K_2[Pt(CN)_6]$ .

**Table S1.** Crystal data and structure refinement for  $K_4[M(CN)_6] \cdot 3H_2O$ , M=Fe, Ru, Os

| Composition                       | $K_4[Fe(CN)_6] \cdot 3H_2O$                                                  | $K_4[Ru(CN)_6] \cdot 3H_2O$                                                   | $K_4[Os(CN)_6] \cdot 3H_2O$                                                   |
|-----------------------------------|------------------------------------------------------------------------------|-------------------------------------------------------------------------------|-------------------------------------------------------------------------------|
| <b>Crystal data</b>               |                                                                              |                                                                               |                                                                               |
| Crystal description               | Prism, light yellow                                                          | Prism, colorless                                                              | Plate, colorless                                                              |
| Crystal size                      | 0.268 x 0.167 x 0.092 mm <sup>3</sup>                                        | 0.204 x 0.151 x 0.030 mm <sup>3</sup>                                         | 0.194 x 0.118 x 0.019 mm <sup>3</sup>                                         |
| Empirical formula                 | C <sub>6</sub> H <sub>6</sub> FeK <sub>4</sub> N <sub>6</sub> O <sub>3</sub> | C <sub>6</sub> H <sub>6</sub> K <sub>4</sub> N <sub>6</sub> O <sub>3</sub> Ru | C <sub>6</sub> H <sub>6</sub> K <sub>4</sub> N <sub>6</sub> O <sub>3</sub> Os |
| Formula weight                    | 422.42                                                                       | 467.64                                                                        | 556.77                                                                        |
| Crystal system                    | Monoclinic                                                                   | Monoclinic                                                                    | Monoclinic                                                                    |
| Space group                       | C 2/c [15]                                                                   | C 2/c [15]                                                                    | C 2/c [15]                                                                    |
| Unit cell dimensions              | a = 9.3940(4) Å<br>b = 16.8754(8) Å<br>c = 9.3975(4) Å<br>β = 90.0100(10)°   | a = 9.4888(3) Å<br>b = 17.0598(6) Å<br>c = 9.4998(3) Å<br>β = 90.1760(10)°    | a = 9.4865(3) Å<br>b = 17.0659(6) Å<br>c = 9.4952(3) Å<br>β = 90.0900(10)°    |
| Volume                            | 1489.76(11) Å <sup>3</sup>                                                   | 1537.79(9) Å <sup>3</sup>                                                     | 1537.23(9) Å <sup>3</sup>                                                     |
| Z                                 | 4                                                                            | 4                                                                             | 4                                                                             |
| Density (calculated)              | 1.883 Mg/m <sup>3</sup>                                                      | 2.020 Mg/m <sup>3</sup>                                                       | 2.406 Mg/m <sup>3</sup>                                                       |
| Absorption coefficient            | 2.142 mm <sup>-1</sup>                                                       | 2.114 mm <sup>-1</sup>                                                        | 9.390 mm <sup>-1</sup>                                                        |
| F(000)                            | 840                                                                          | 912                                                                           | 1040                                                                          |
| <b>Data collection</b>            |                                                                              |                                                                               |                                                                               |
| Diffractometer                    | D8 Venture Bruker                                                            | D8 Venture Bruker                                                             | D8 Venture Bruker                                                             |
| Wavelength                        | 0.71073 Å (Mo Kα)                                                            | 0.71073 Å (Mo Kα)                                                             | 0.71073 Å (Mo Kα)                                                             |
| Monochromator                     | Graphite                                                                     | Graphite                                                                      | Graphite                                                                      |
| Temperature                       | 296(2) K                                                                     | 296(2) K                                                                      | 296(2) K                                                                      |
| Theta range for data collection   | 3.245 to 26.371°                                                             | 3.210 to 26.365°                                                              | 3.210 to 26.372°                                                              |
| Index ranges                      | -11<=h<=11, -21<=k<=21,<br>-11<=l<=11                                        | -11<=h<=11, -21<=k<=21,<br>-11<=l<=11                                         | -11<=h<=11, -21<=k<=21,<br>-11<=l<=11                                         |
| Reflections collected             | 25859                                                                        | 35191                                                                         | 40475                                                                         |
| Independent reflections           | 1097 [R(int) = 0.0418]                                                       | 1571 [R(int) = 0.0234]                                                        | 1576 [R(int) = 0.0316]                                                        |
| Completeness to θ = 25.242°       | 99.6%                                                                        | 99.7%                                                                         | 99.9%                                                                         |
| <b>Refinement</b>                 |                                                                              |                                                                               |                                                                               |
| Absorption correction             | Numerical from crystal shape                                                 | Numerical from crystal shape                                                  | Numerical from crystal shape                                                  |
| Min. and max. transmission        | 0.598 and 0.827                                                              | 0.614 and 0.9                                                                 | 0.263 and 0.842                                                               |
| Refinement method                 | Full-matrix least-squares on F <sup>2</sup>                                  | Full-matrix least-squares on F <sup>2</sup>                                   | Full-matrix least-squares on F <sup>2</sup>                                   |
| Data / restraints / parameters    | 1097 / 0 / 98                                                                | 1571 / 0 / 98                                                                 | 1576 / 0 / 98                                                                 |
| Goodness-of-fit on F <sup>2</sup> | 1.115                                                                        | 1.127                                                                         | 1.248                                                                         |
| Final R indices [I>2σ(I)]         | R1 = 0.0390, wR2 = 0.1168                                                    | R1 = 0.0168, wR2 = 0.0419                                                     | R1 = 0.0172, wR2 = 0.0552                                                     |
| R indices (all data)              | R1 = 0.0475, wR2 = 0.1226                                                    | R1 = 0.0182, wR2 = 0.0425                                                     | R1 = 0.0180, wR2 = 0.0555                                                     |
| Largest diff. peak and hole       | 0.711 and -0.403 e.Å <sup>-3</sup>                                           | 0.413 and -0.510 e.Å <sup>-3</sup>                                            | 0.936 and -0.888 e.Å <sup>-3</sup>                                            |

**Table S2.** Fractional atomic coordinates, equivalent isotropic displacement parameters and occupation factors for  $K_4[M(CN)_6] \cdot 3H_2O$ ,  $M=Fe, Ru, Os$

| Structure                                     | Site | x          | y          | z          | $U_{eq} (\text{Å}^2)$ | Occ     |
|-----------------------------------------------|------|------------|------------|------------|-----------------------|---------|
| <b><math>K_4[Fe(CN)_6] \cdot 3H_2O</math></b> |      |            |            |            |                       |         |
| K1                                            | 8f   | 0.5968(1)  | 0.1440(1)  | 0.4389(1)  | 0.033(1)              | 1       |
| K2                                            | 8f   | 0.3141(1)  | 0.3585(1)  | 0.3436(1)  | 0.034(1)              | 1       |
| Fe                                            | 4e   | 0          | 0.1773(1)  | 1/4        | 0.017(1)              | 1       |
| C1                                            | 4e   | 0          | 0.0637(3)  | 1/4        | 0.029(1)              | 1       |
| N1                                            | 4e   | 0          | -0.0055(3) | 1/4        | 0.044(1)              | 1       |
| C2                                            | 4e   | 0          | 0.2920(3)  | 1/4        | 0.020(1)              | 1       |
| N2                                            | 4e   | 0          | 0.3580(3)  | 1/4        | 0.032(1)              | 1       |
| C3                                            | 8f   | 0.0680(4)  | 0.1775(2)  | 0.0576(4)  | 0.022(1)              | 1       |
| N3                                            | 8f   | 0.1093(4)  | 0.1775(2)  | -0.0603(4) | 0.034(1)              | 1       |
| C4                                            | 8f   | 0.1927(4)  | 0.1769(2)  | 0.3187(4)  | 0.022(1)              | 1       |
| N4                                            | 8f   | 0.3086(4)  | 0.1752(2)  | 0.3612(4)  | 0.036(1)              | 1       |
| O1                                            | 8f   | 0.2430(5)  | -0.0021(2) | 0.4849(7)  | 0.083(2)              | 1       |
| H1A                                           | 8f   | 0.2619     | -0.0338    | 0.4023     | 0.124                 | 1       |
| H1B                                           | 8f   | 0.1488     | 0.0185     | 0.4699     | 0.124                 | 1       |
| O2                                            | 8f   | 0.4661(10) | 0.0282(3)  | 0.2803(11) | 0.056(3)              | 0.50(1) |
| H2A                                           | 4e   | 1/2        | -0.0228    | 1/4        | 0.084                 | 1       |
| H2B                                           | 8f   | 0.3669     | 0.0285     | 0.2555     | 0.084                 | 0.50(1) |
| <b><math>K_4[Ru(CN)_6] \cdot 3H_2O</math></b> |      |            |            |            |                       |         |
| K1                                            | 8f   | 0.5998(1)  | 0.1440(1)  | 0.4390(1)  | 0.032(1)              | 1       |
| K2                                            | 8f   | 0.3146(1)  | 0.3579(1)  | 0.3463(1)  | 0.033(1)              | 1       |
| Ru                                            | 4e   | 0          | 0.1778(1)  | 1/4        | 0.015(1)              | 1       |
| C1                                            | 4e   | 0          | 0.0582(2)  | 1/4        | 0.027(1)              | 1       |
| N1                                            | 4e   | 0          | -0.0093(2) | 1/4        | 0.051(1)              | 1       |
| C2                                            | 4e   | 0          | 0.2982(2)  | 1/4        | 0.019(1)              | 1       |
| N2                                            | 4e   | 0          | 0.3641(1)  | 1/4        | 0.034(1)              | 1       |
| C3                                            | 8f   | 0.0723(2)  | 0.1780(1)  | 0.0480(2)  | 0.020(1)              | 1       |
| N3                                            | 8f   | 0.1129(2)  | 0.1785(1)  | -0.0666(2) | 0.031(1)              | 1       |
| C4                                            | 8f   | 0.2018(2)  | 0.1773(1)  | 0.3236(2)  | 0.020(1)              | 1       |
| N4                                            | 8f   | 0.3159(2)  | 0.1761(1)  | 0.3659(2)  | 0.034(1)              | 1       |
| O1                                            | 8f   | 0.2408(3)  | -0.0020(1) | 0.4867(3)  | 0.087(1)              | 1       |
| H1A                                           | 8f   | 0.1543     | 0.0187     | 0.4496     | 0.130                 | 1       |
| H1B                                           | 8f   | 0.2740     | -0.0372    | 0.4153     | 0.130                 | 1       |
| O2                                            | 8f   | 0.4617(4)  | 0.0303(2)  | 0.2778(5)  | 0.059(1)              | 0.50(1) |
| H2A                                           | 4e   | 1/2        | -0.0195    | 1/4        | 0.088                 | 1       |
| H2B                                           | 8f   | 0.3621     | 0.0256     | 0.2615     | 0.088                 | 0.50(1) |
| <b><math>K_4[Os(CN)_6] \cdot 3H_2O</math></b> |      |            |            |            |                       |         |
| K1                                            | 8f   | 0.5999(1)  | 0.1439(1)  | 0.4389(1)  | 0.028(1)              | 1       |
| K2                                            | 8f   | 0.3149(1)  | 0.3580(1)  | 0.3463(1)  | 0.028(1)              | 1       |
| Os                                            | 4e   | 0          | 0.1780(1)  | 1/4        | 0.015(1)              | 1       |
| C1                                            | 4e   | 0          | 0.0581(3)  | 1/4        | 0.023(1)              | 1       |
| N1                                            | 4e   | 0          | -0.0094(4) | 1/4        | 0.045(2)              | 1       |
| C2                                            | 4e   | 0          | 0.2995(3)  | 1/4        | 0.014(1)              | 1       |
| N2                                            | 4e   | 0          | 0.3640(3)  | 1/4        | 0.029(1)              | 1       |
| C3                                            | 8f   | 0.0723(4)  | 0.1781(2)  | 0.0475(4)  | 0.014(1)              | 1       |
| N3                                            | 8f   | 0.1136(4)  | 0.1787(2)  | -0.0669(4) | 0.026(1)              | 1       |
| C4                                            | 8f   | 0.2021(4)  | 0.1773(2)  | 0.3241(4)  | 0.015(1)              | 1       |
| N4                                            | 8f   | 0.3165(4)  | 0.1762(2)  | 0.3663(4)  | 0.028(1)              | 1       |
| O1                                            | 8f   | 0.2416(6)  | -0.0026(3) | 0.4857(6)  | 0.077(2)              | 1       |
| H1A                                           | 8f   | 0.1739     | -0.0361    | 0.4407     | 0.116                 | 1       |
| H1B                                           | 8f   | 0.2291     | 0.0474     | 0.4408     | 0.116                 | 1       |
| O2                                            | 8f   | 0.4609(9)  | 0.0293(4)  | 0.2777(11) | 0.055(2)              | 0.50(1) |
| H2A                                           | 4e   | 1/2        | -0.0203    | 1/4        | 0.083                 | 1       |
| H2B                                           | 8f   | 0.3622     | 0.0247     | 0.2567     | 0.083                 | 0.50(1) |

**Table S3.** Selected bond distances and bond angles for  $K_4[M(CN)_6] \cdot 3H_2O$ , M=Fe, Ru, Os

| Structure                                     | Atoms      | Bond distance (Å) | Atoms    | Bond angle (°) |
|-----------------------------------------------|------------|-------------------|----------|----------------|
| <b><math>K_4[Fe(CN)_6] \cdot 3H_2O</math></b> | Fe-C1      | 1.917(5)          | N1-C1-Fe | 180.0          |
|                                               | Fe-C2      | 1.936(5)          | N2-C2-Fe | 180.0          |
|                                               | Fe-C3      | 1.918(4)          | N3-C3-Fe | 179.8(4)       |
|                                               | Fe-C4      | 1.922(4)          | N4-C4-Fe | 178.7(3)       |
|                                               | C1-N1      | 1.168(7)          | C1-N1-K2 | 139.57(6)      |
|                                               | C2-N2      | 1.113(8)          | C2-N2-K1 | 89.37(9)       |
|                                               | C3-N3      | 1.174(6)          | C2-N2-K2 | 90.16(9)       |
|                                               | C4-N4      | 1.159(5)          | C3-N3-K1 | 86.9(2)        |
|                                               | K1-N2      | 3.0616(10)        | C3-N3-K2 | 88.8(3)        |
|                                               | K1-N3      | 3.014(4)          | C3-N3-K1 | 89.4(3)        |
|                                               | K1-N3      | 3.041(4)          | C3-N3-K2 | 166.9(3)       |
|                                               | K1-N4      | 2.853(3)          | C4-N4-K1 | 87.7(3)        |
|                                               | K1-N4      | 3.004(4)          | C4-N4-K2 | 87.9(3)        |
|                                               | K1-O1      | 2.918(4)          | C4-N4-K2 | 88.5(3)        |
|                                               | K1-O2      | 2.748(9)          | C4-N4-K1 | 169.5(3)       |
|                                               | K1-O2      | 2.901(9)          |          |                |
|                                               | K2-N1      | 3.016(4)          |          |                |
|                                               | K2-N2      | 3.0784(9)         |          |                |
|                                               | K2-N3      | 2.825(4)          |          |                |
|                                               | K2-N3      | 2.979(4)          |          |                |
| K2-N4                                         | 3.057(5)   |                   |          |                |
| K2-N4                                         | 3.097(4)   |                   |          |                |
| K2-O1                                         | 2.959(5)   |                   |          |                |
| <b><math>K_4[Ru(CN)_6] \cdot 3H_2O</math></b> | Ru-C1      | 2.040(3)          | N1-C1-Ru | 180.0          |
|                                               | Ru-C2      | 2.054(3)          | N2-C2-Ru | 180.0          |
|                                               | Ru-C3      | 2.0396(17)        | N3-C3-Ru | 179.62(17)     |
|                                               | Ru-C4      | 2.0364(17)        | N4-C4-Ru | 179.19(16)     |
|                                               | C1-N1      | 1.151(4)          | C1-N1-K2 | 138.78(3)      |
|                                               | C2-N2      | 1.126(4)          | C2-N2-K1 | 87.45(4)       |
|                                               | C3-N3      | 1.156(2)          | C2-N2-K2 | 88.04(4)       |
|                                               | C4-N4      | 1.154(2)          | C3-N3-K1 | 85.66(12)      |
|                                               | K1-N2      | 3.1079(4)         | C3-N3-K2 | 86.64(12)      |
|                                               | K1-N3      | 3.0316(18)        | C3-N3-K1 | 88.70(12)      |
|                                               | K1-N3      | 3.0379(17)        | C3-N3-K2 | 165.93(15)     |
|                                               | K1-N4      | 2.8337(17)        | C4-N4-K1 | 85.49(12)      |
|                                               | K1-N4      | 3.0573(18)        | C4-N4-K2 | 86.13(12)      |
|                                               | K1-O1      | 2.940(2)          | C4-N4-K2 | 87.61(12)      |
|                                               | K1-O2      | 2.795(4)          | C4-N4-K1 | 168.26(15)     |
|                                               | K1-O2      | 2.888(4)          |          |                |
|                                               | K2-N1      | 3.013(2)          |          |                |
|                                               | K2-N2      | 3.1209(4)         |          |                |
|                                               | K2-N3      | 2.8160(16)        |          |                |
|                                               | K2-N3      | 3.0115(18)        |          |                |
| K2-N4                                         | 3.0605(18) |                   |          |                |
| K2-N4                                         | 3.1065(19) |                   |          |                |
| K2-O1                                         | 2.974(2)   |                   |          |                |



Table S3. Continued

| Structure                                                | Atoms | Bond distance (Å) | Atoms    | Bond angle (°) |
|----------------------------------------------------------|-------|-------------------|----------|----------------|
| <b>K<sub>4</sub>[Os(CN)<sub>6</sub>]·3H<sub>2</sub>O</b> | Os-C1 | 2.046(6)          | N1-C1-Os | 180.0          |
|                                                          | Os-C2 | 2.073(6)          | N2-C2-Os | 180.0          |
|                                                          | Os-C3 | 2.043(4)          | N3-C3-Os | 179.5(3)       |
|                                                          | Os-C4 | 2.041(4)          | N4-C4-Os | 179.4(3)       |
|                                                          | C1-N1 | 1.152(9)          | C1-N1-K2 | 138.80(8)      |
|                                                          | C2-N2 | 1.101(8)          | C2-N2-K1 | 87.53(11)      |
|                                                          | C3-N3 | 1.155(6)          | C2-N2-K2 | 88.13(11)      |
|                                                          | C4-N4 | 1.157(6)          | C3-N3-K1 | 85.8(3)        |
|                                                          | K1-N2 | 3.1067(9)         | C3-N3-K2 | 86.3(3)        |
|                                                          | K1-N3 | 3.032(4)          | C3-N3-K1 | 88.7(2)        |
|                                                          | K1-N3 | 3.035(4)          | C3-N3-K2 | 165.6(3)       |
|                                                          | K1-N4 | 2.828(4)          | C4-N4-K1 | 85.4(3)        |
|                                                          | K1-N4 | 3.056(4)          | C4-N4-K2 | 85.9(3)        |
|                                                          | K1-O1 | 2.930(5)          | C4-N4-K2 | 87.6(3)        |
|                                                          | K1-O2 | 2.810(9)          | C4-N4-K1 | 168.2(3)       |
|                                                          | K1-O2 | 2.895(9)          |          |                |
|                                                          | K2-N1 | 3.008(5)          |          |                |
|                                                          | K2-N2 | 3.1239(9)         |          |                |
|                                                          | K2-N3 | 2.809(4)          |          |                |
|                                                          | K2-N3 | 3.016(4)          |          |                |
|                                                          | K2-N4 | 3.059(4)          |          |                |
|                                                          | K2-N4 | 3.109(4)          |          |                |
|                                                          | K2-O1 | 2.987(5)          |          |                |

**Table S4.** Crystal data and structure refinement for  $K_3[M(CN)_6]$ , M=Co, Rh, Ir

| Composition                             | $K_3[Co(CN)_6]$                                         | $K_3[Rh(CN)_6]$                                            | $K_3[Ir(CN)_6]$                                         |
|-----------------------------------------|---------------------------------------------------------|------------------------------------------------------------|---------------------------------------------------------|
| <b>Crystal data</b>                     |                                                         |                                                            |                                                         |
| Crystal description                     | Plate, colorless                                        | Plate, colorless                                           | Plate, colorless                                        |
| Crystal size                            | 0.204 x 0.151 x 0.030 mm <sup>3</sup>                   | 0.181 x 0.177 x 0.026 mm <sup>3</sup>                      | 0.151 x 0.114 x 0.021 mm <sup>3</sup>                   |
| Empirical formula                       | C <sub>6</sub> CoK <sub>3</sub> N <sub>6</sub>          | C <sub>6</sub> K <sub>3</sub> N <sub>6</sub> Rh            | C <sub>6</sub> IrK <sub>3</sub> N <sub>6</sub>          |
| Formula weight                          | 332.35                                                  | 376.33                                                     | 465.62                                                  |
| Crystal system                          | Orthorhombic                                            | Orthorhombic                                               | Orthorhombic                                            |
| Space group                             | P b c n [60]                                            | P b c n [60]                                               | P b c n [60]                                            |
| Unit cell dimensions                    | a = 10.3511(5) Å<br>b = 8.3612(4) Å<br>c = 13.3549(7) Å | a = 10.5092(16) Å<br>b = 8.4568(12) Å<br>c = 13.5808(19) Å | a = 10.5320(4) Å<br>b = 8.4511(3) Å<br>c = 13.5945(5) Å |
| Volume                                  | 1155.84(10) Å <sup>3</sup>                              | 1207.0(3) Å <sup>3</sup>                                   | 1210.01(8) Å <sup>3</sup>                               |
| Z                                       | 4                                                       | 4                                                          | 4                                                       |
| Density (calculated)                    | 1.910 Mg/m <sup>3</sup>                                 | 2.071 Mg/m <sup>3</sup>                                    | 2.556 Mg/m <sup>3</sup>                                 |
| Absorption coefficient                  | 2.542 mm <sup>-1</sup>                                  | 2.428 mm <sup>-1</sup>                                     | 12.045 mm <sup>-1</sup>                                 |
| F(000)                                  | 648                                                     | 720                                                        | 848                                                     |
| <b>Data collection</b>                  |                                                         |                                                            |                                                         |
| Diffractometer                          | D8 Venture Bruker                                       | D8 Venture Bruker                                          | D8 Venture Bruker                                       |
| Wavelength                              | 0.71073 Å (Mo Kα)                                       | 0.71073 Å (Mo Kα)                                          | 0.71073 Å (Mo Kα)                                       |
| Monochromator                           | Graphite                                                | Graphite                                                   | Graphite                                                |
| Temperature                             | 296(2) K                                                | 296(2) K                                                   | 296(2) K                                                |
| Theta range for data collection         | 3.484 to 26.372°                                        | 3.572 to 26.371°                                           | 3.567 to 26.364°                                        |
| Index ranges                            | -12<=h<=12, -10<=k<=10,<br>-16<=l<=16                   | -13<=h<=13, -10<=k<=10,<br>-16<=l<=16                      | -12<=h<=13, -10<=k<=10,<br>-16<=l<=16                   |
| Reflections collected                   | 60218                                                   | 12201                                                      | 30455                                                   |
| Independent reflections                 | 1183 [R(int) = 0.0374]                                  | 632 [R(int) = 0.0679]                                      | 1232 [R(int) = 0.0347]                                  |
| Completeness to $\theta = 25.242^\circ$ | 99.5%                                                   | 99.6%                                                      | 99.5%                                                   |
| <b>Refinement</b>                       |                                                         |                                                            |                                                         |
| Absorption correction                   | Numerical from crystal shape                            | Numerical from crystal shape                               | Numerical from crystal shape                            |
| Min. and max. transmission              | 0.625 and 0.928                                         | 0.668 and 0.94                                             | 0.264 and 0.286                                         |
| Refinement method                       | Full-matrix least-squares on F <sup>2</sup>             | Full-matrix least-squares on F <sup>2</sup>                | Full-matrix least-squares on F <sup>2</sup>             |
| Data / restraints / parameters          | 1184 / 0 / 74                                           | 632 / 0 / 74                                               | 1232 / 0 / 74                                           |
| Goodness-of-fit on F <sup>2</sup>       | 1.142                                                   | 1.069                                                      | 1.208                                                   |
| Final R indices [ $I > 2\sigma(I)$ ]    | R1 = 0.0687, wR2 = 0.1235                               | R1 = 0.0573, wR2 = 0.1189                                  | R1 = 0.0170, wR2 = 0.0385                               |
| R indices (all data)                    | R1 = 0.0899, wR2 = 0.1452                               | R1 = 0.0853, wR2 = 0.1363                                  | R1 = 0.0285, wR2 = 0.0427                               |
| Largest diff. peak and hole             | 0.792 and -0.481 e.Å <sup>-3</sup>                      | 0.787 and -0.578 e.Å <sup>-3</sup>                         | 0.371 and -0.866 e.Å <sup>-3</sup>                      |

**Table S5.** Fractional atomic coordinates, equivalent isotropic displacement parameters and occupation factors for  $K_3[M(CN)_6]$ ,  $M=Co, Rh, Ir$

| Structure                         | Site | x          | y           | z          | $U_{eq}$ (Å <sup>2</sup> ) | Occ |
|-----------------------------------|------|------------|-------------|------------|----------------------------|-----|
| <b><math>K_3[Co(CN)_6]</math></b> |      |            |             |            |                            |     |
| K1                                | 4c   | 0          | 0.6265(1)   | 1/4        | 0.016(1)                   | 1   |
| K2                                | 8d   | 0.2681(2)  | 0.1240(1)   | -0.0011(1) | 0.035(1)                   | 1   |
| Co                                | 4c   | 0          | 0.1239(1)   | 1/4        | 0.013(1)                   | 1   |
| C1                                | 8d   | 0.0531(4)  | -0.0342(5)  | 0.1590(3)  | 0.027(1)                   | 1   |
| N1                                | 8d   | 0.0857(5)  | -0.1317(4)  | 0.1024(3)  | 0.031(1)                   | 1   |
| C2                                | 8d   | 0.0502(4)  | 0.2838(5)   | 0.1576(3)  | 0.025(1)                   | 1   |
| N2                                | 8d   | 0.0816(4)  | 0.3811(4)   | 0.1031(3)  | 0.029(1)                   | 1   |
| C3                                | 8d   | 0.1663(5)  | 0.1247(5)   | 0.3102(3)  | 0.027(1)                   | 1   |
| N3                                | 8d   | 0.2619(4)  | 0.1241(4)   | 0.3490(4)  | 0.029(1)                   | 1   |
| <b><math>K_3[Rh(CN)_6]</math></b> |      |            |             |            |                            |     |
| K1                                | 4c   | 0          | 0.6267(5)   | 1/4        | 0.016(1)                   | 1   |
| K2                                | 8d   | 0.2639(4)  | 0.1242(5)   | -0.0017(2) | 0.047(1)                   | 1   |
| Rh                                | 4c   | 0          | 0.1238(2)   | 1/4        | 0.022(1)                   | 1   |
| C1                                | 8d   | 0.0549(12) | -0.0400(18) | 0.1533(10) | 0.032(3)                   | 1   |
| N1                                | 8d   | 0.0859(11) | -0.1359(16) | 0.0990(8)  | 0.043(3)                   | 1   |
| C2                                | 8d   | 0.0550(12) | 0.2935(13)  | 0.1543(9)  | 0.028(3)                   | 1   |
| N2                                | 8d   | 0.0887(11) | 0.3874(15)  | 0.1014(8)  | 0.040(3)                   | 1   |
| C3                                | 8d   | 0.1746(10) | 0.1248(16)  | 0.3142(8)  | 0.030(2)                   | 1   |
| N3                                | 8d   | 0.2677(9)  | 0.1246(18)  | 0.3500(7)  | 0.035(2)                   | 1   |
| <b><math>K_3[Ir(CN)_6]</math></b> |      |            |             |            |                            |     |
| K1                                | 4c   | 0          | 0.6283(2)   | 1/4        | 0.027(1)                   | 1   |
| K2                                | 8d   | 0.2693(1)  | 0.1231(1)   | -0.0019(1) | 0.039(1)                   | 1   |
| Ir                                | 4c   | 0          | 0.1240(1)   | 1/4        | 0.017(1)                   | 1   |
| C1                                | 8d   | 0.0565(4)  | -0.0435(4)  | 0.1526(3)  | 0.025(1)                   | 1   |
| N1                                | 8d   | 0.0885(3)  | -0.1384(4)  | 0.0982(3)  | 0.041(1)                   | 1   |
| C2                                | 8d   | 0.0554(4)  | 0.2939(4)   | 0.1542(3)  | 0.023(1)                   | 1   |
| N2                                | 8d   | 0.0857(4)  | 0.3932(4)   | 0.1014(3)  | 0.038(1)                   | 1   |
| C3                                | 8d   | 0.1737(3)  | 0.1238(5)   | 0.3130(2)  | 0.024(1)                   | 1   |
| N3                                | 8d   | 0.2707(3)  | 0.1255(6)   | 0.3510(2)  | 0.034(1)                   | 1   |

**Table S6.** Selected bond distances and bond angles for  $K_3[M(CN)_6]$ , M=Co, Rh, Ir.

| Structure       | Atoms     | Bond distance (Å) | Atoms    | Bond angle (°) |
|-----------------|-----------|-------------------|----------|----------------|
| $K_3[Co(CN)_6]$ | Co-C1     | 1.878(4)          | N1-C1-Co | 179.7(4)       |
|                 | Co-C2     | 1.892(4)          | N2-C2-Co | 178.9(4)       |
|                 | Co-C3     | 1.902(5)          | N3-C3-Co | 177.3(5)       |
|                 | C1-N1     | 1.162(5)          | C1-N1-K1 | 87.6(3)        |
|                 | C2-N2     | 1.140(6)          | C1-N1-K2 | 89.1(3)        |
|                 | C3-N3     | 1.115(7)          | C1-N1-K2 | 163.4(4)       |
|                 | K1-N1     | 2.960(4)          | C2-N2-K2 | 88.3(3)        |
|                 | K1-N2     | 2.962(4)          | C2-N2-K1 | 89.4(3)        |
|                 | K1-N3     | 2.797(5)          | C2-N2-K2 | 162.9(4)       |
|                 | K2-N1     | 2.894(4)          | C3-N3-K2 | 102.8(4)       |
|                 | K2-N1     | 3.170(4)          | C3-N3-K2 | 110.2(4)       |
|                 | K2-N2     | 2.912(4)          | C3-N3-K1 | 124.1(4)       |
|                 | K2-N2     | 3.206(4)          |          |                |
|                 | K2-N3     | 2.883(4)          |          |                |
| K2-N3           | 2.922(5)  |                   |          |                |
| $K_3[Rh(CN)_6]$ | Rh-C1     | 1.994(15)         | N1-C1-Rh | 178.8(12)      |
|                 | Rh-C2     | 2.020(12)         | N2-C2-Rh | 178.3(11)      |
|                 | Rh-C3     | 2.032(12)         | N3-C3-Rh | 178.9(11)      |
|                 | C1-N1     | 1.143(18)         | C1-N1-K1 | 87.0(9)        |
|                 | C2-N2     | 1.128(16)         | C1-N1-K2 | 87.4(10)       |
|                 | C3-N3     | 1.093(14)         | C1-N1-K2 | 162.1(11)      |
|                 | K1-N1     | 3.009(13)         | C2-N2-K1 | 87.0(8)        |
|                 | K1-N2     | 3.006(11)         | C2-N2-K2 | 88.3(9)        |
|                 | K1-N3     | 2.794(10)         | C2-N2-K2 | 164.5(10)      |
|                 | K2-N1     | 2.912(12)         | C3-N3-K2 | 101.7(10)      |
|                 | K2-N1     | 3.195(14)         | C3-N3-K2 | 107.2(11)      |
|                 | K2-N2     | 2.893(13)         | C3-N3-K1 | 124.5(9)       |
|                 | K2-N2     | 3.210(12)         |          |                |
|                 | K2-N3     | 2.913(14)         |          |                |
| K2-N3           | 2.945(13) |                   |          |                |
| $K_3[Ir(CN)_6]$ | Ir-C1     | 2.027(4)          | N1-C1-Ir | 179.6(4)       |
|                 | Ir-C2     | 2.025(4)          | N2-C2-Ir | 178.3(3)       |
|                 | Ir-C3     | 2.019(4)          | N3-C3-Ir | 178.1(3)       |
|                 | C1-N1     | 1.142(5)          | C1-N1-K1 | 85.7(3)        |
|                 | C2-N2     | 1.149(5)          | C1-N1-K2 | 88.1(3)        |
|                 | C3-N3     | 1.145(4)          | C1-N1-K2 | 163.6(3)       |
|                 | K1-N1     | 3.003(4)          | C2-N2-K2 | 85.6(3)        |
|                 | K1-N2     | 2.973(4)          | C2-N2-K1 | 88.8(3)        |
|                 | K1-N3     | 2.778(3)          | C2-N2-K2 | 163.1(3)       |
|                 | K2-N1     | 2.856(4)          | C3-N3-K2 | 100.8(3)       |
|                 | K2-N1     | 3.218(4)          | C3-N3-K2 | 107.3(3)       |
|                 | K2-N2     | 2.843(3)          | C3-N3-K1 | 123.6(3)       |
|                 | K2-N2     | 3.304(4)          |          |                |
|                 | K2-N3     | 2.901(4)          |          |                |
| K2-N3           | 2.949(4)  |                   |          |                |



**Table S7.** Crystal data and structure refinement for  $K_2[Pt(CN)_6]$ 

| Composition                             | $K_2[Pt(CN)_6]$                                 |
|-----------------------------------------|-------------------------------------------------|
| <b>Crystal data</b>                     |                                                 |
| Crystal description                     | Prism, colorless                                |
| Crystal size                            | 0.275 x 0.210 x 0.054 mm <sup>3</sup>           |
| Empirical formula                       | C <sub>6</sub> K <sub>2</sub> N <sub>6</sub> Pt |
| Formula weight                          | 429.41                                          |
| Crystal system                          | Trigonal                                        |
| Space group                             | P -3 1 m [162]                                  |
| Unit cell dimensions                    | a = 7.3928(4) Å<br>c = 6.6613(3) Å              |
| Volume                                  | 315.29(4) Å <sup>3</sup>                        |
| Z                                       | 1                                               |
| Density (calculated)                    | 2.262 Mg/m <sup>3</sup>                         |
| Absorption coefficient                  | 11.763 mm <sup>-1</sup>                         |
| F(000)                                  | 194                                             |
| <b>Data collection</b>                  |                                                 |
| Diffractometer                          | D8 Venture Bruker                               |
| Wavelength                              | 0.71073 Å (Mo Kα)                               |
| Monochromator                           | Graphite                                        |
| Temperature                             | 296(2) K                                        |
| Theta range for data collection         | 6.374 to 26.362°                                |
| Index ranges                            | -9 ≤ h ≤ 9, -9 ≤ k ≤ 9,<br>-8 ≤ l ≤ 8           |
| Reflections collected                   | 7539                                            |
| Independent reflections                 | 242 [R(int) = 0.0304]                           |
| Completeness to $\theta = 25.242^\circ$ | 95%                                             |
| <b>Refinement</b>                       |                                                 |
| Absorption correction                   | Numerical from crystal shape                    |
| Min. and max. transmission              | 0.14 and 0.569                                  |
| Refinement method                       | Full-matrix least-squares on F <sup>2</sup>     |
| Data / restraints / parameters          | 242 / 0 / 17                                    |
| Goodness-of-fit on F <sup>2</sup>       | 1.210                                           |
| Final R indices [I > 2σ(I)]             | R1 = 0.0119, wR2 = 0.0281                       |
| R indices (all data)                    | R1 = 0.0119, wR2 = 0.0281                       |
| Largest diff. peak and hole             | 0.443 and -0.617 e.Å <sup>-3</sup>              |

**Table S8.** Fractional atomic coordinates, equivalent isotropic displacement parameters and occupation factors for  $K_2[Pt(CN)_6]$

| Structure                         | Site | x         | y         | z         | $U_{eq}$ ( $\text{\AA}^2$ ) | Occ |
|-----------------------------------|------|-----------|-----------|-----------|-----------------------------|-----|
| <b><math>K_2[Pt(CN)_6]</math></b> |      |           |           |           |                             |     |
| K                                 | 2d   | 1/3       | 2/3       | 1/2       | 0.036(1)                    | 1   |
| Pt                                | 1a   | 0         | 0         | 0         | 0.019(1)                    | 1   |
| C                                 | 6k   | 0.2222(5) | 0.2222(5) | 0.1748(5) | 0.031(1)                    | 1   |
| N                                 | 6k   | 0.3460(5) | 0.3460(5) | 0.2753(5) | 0.050(1)                    | 1   |

**Table S9.** Selected bond distances and bond angles for  $K_2[Pt(CN)_6]$ .

| Structure                         | Atoms | Bond distance ( $\text{\AA}$ ) | Atoms  | Bond angle ( $^\circ$ ) |
|-----------------------------------|-------|--------------------------------|--------|-------------------------|
| <b><math>K_2[Pt(CN)_6]</math></b> | Pt-C  | 2.014(4)                       | N-C-Pt | 179.1(4)                |
|                                   | C-N   | 1.134(5)                       | C-N-K  | 129.32(10)              |
|                                   | K-N   | 2.845(2)                       |        |                         |

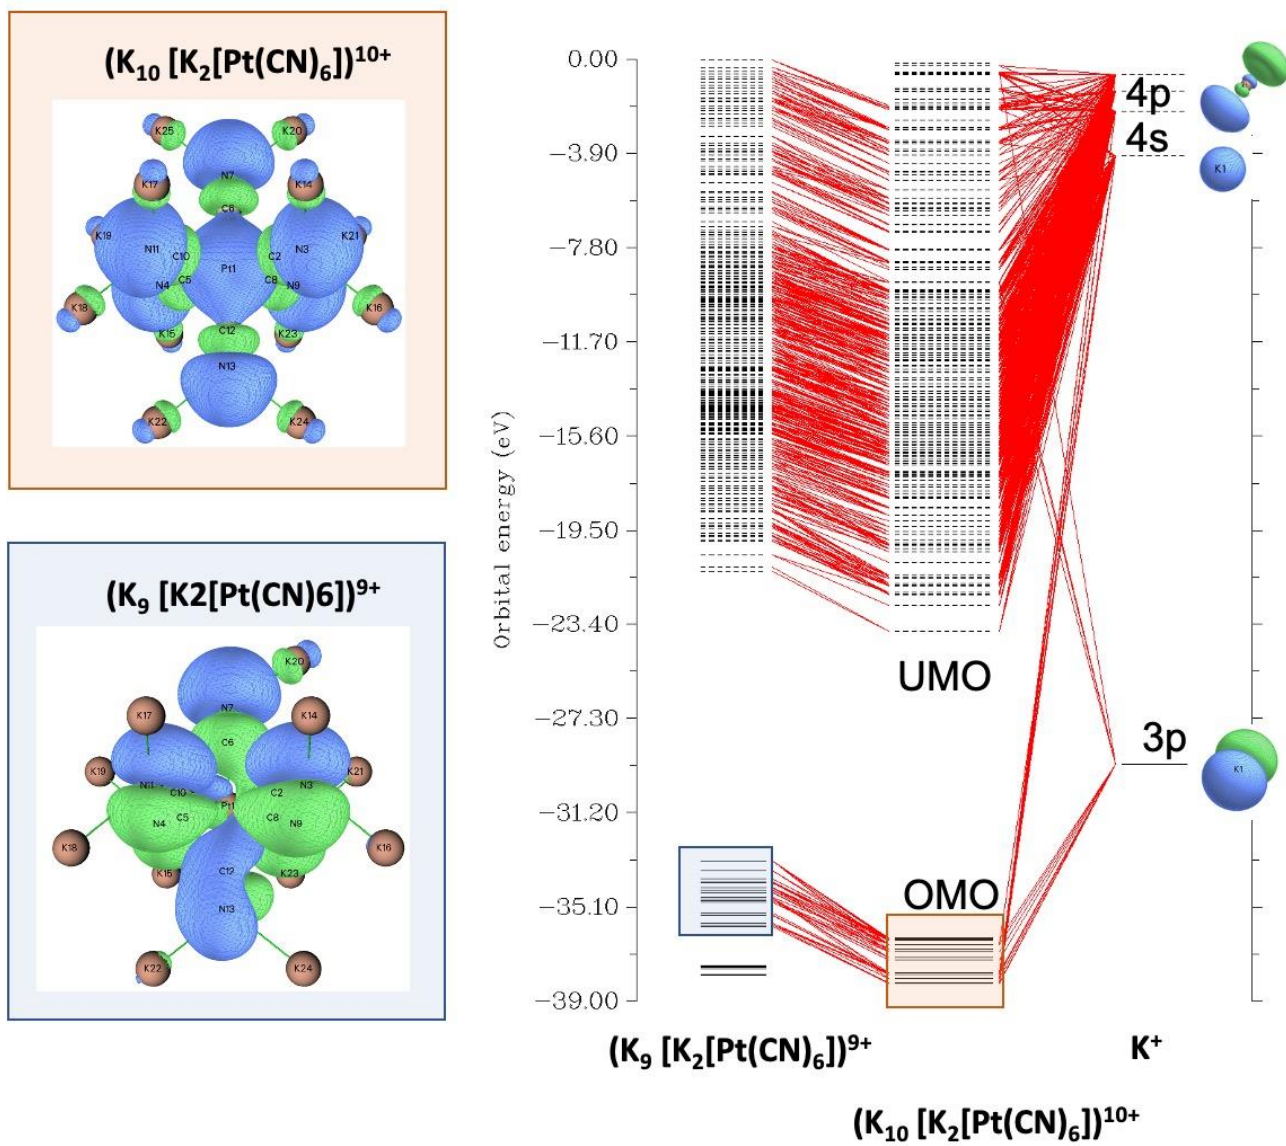

**Figure S17.** Orbital interaction diagram determined by CDA analysis for fragment A ( $(K_9 [K_2 [Pt(CN)_6]])^{9+}$ ) and fragment B ( $K^+$ ) to form the complex ( $(K_{10} [K_2 [Pt(CN)_6]])^{10+}$ ). Occupied (OMO) and unoccupied (UMO) molecular orbitals are represented as solid and dashed lines, respectively. The red lines represent the contribution of the molecular orbitals of the fragments to the complex. Representative orbitals of the interaction and the complex are included.

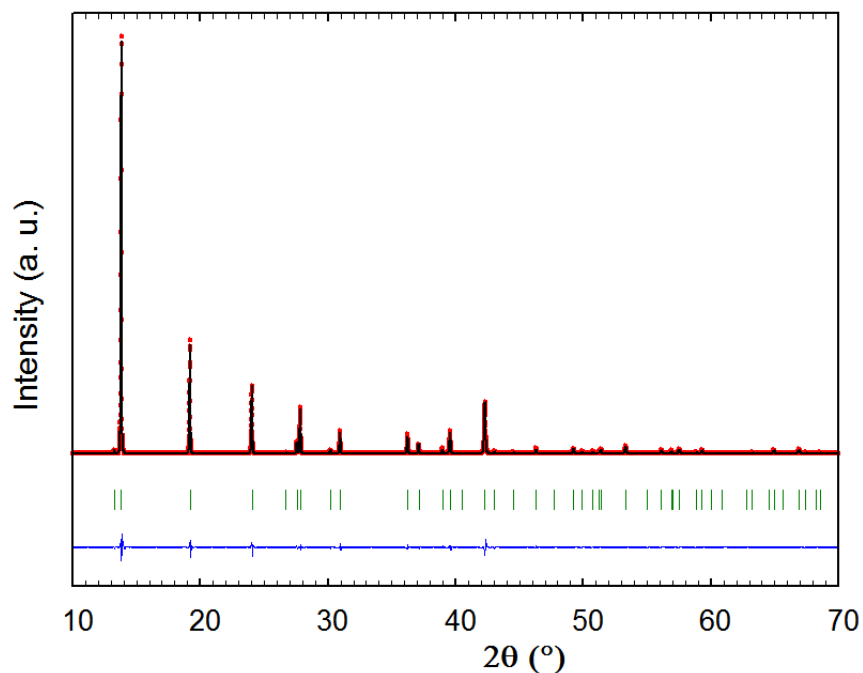

**Figure S18.** XRD powder pattern observed (red), calculated (black) and difference profiles (blue) for the Le Bail refinement of  $K_2[Pt(CN)_6]$  complex. The crystalline phase was identified according to ICSD file number 43076. Similar XRD powder patterns, corresponding to a single phase of the sample under study, were obtained for the remaining K salts.

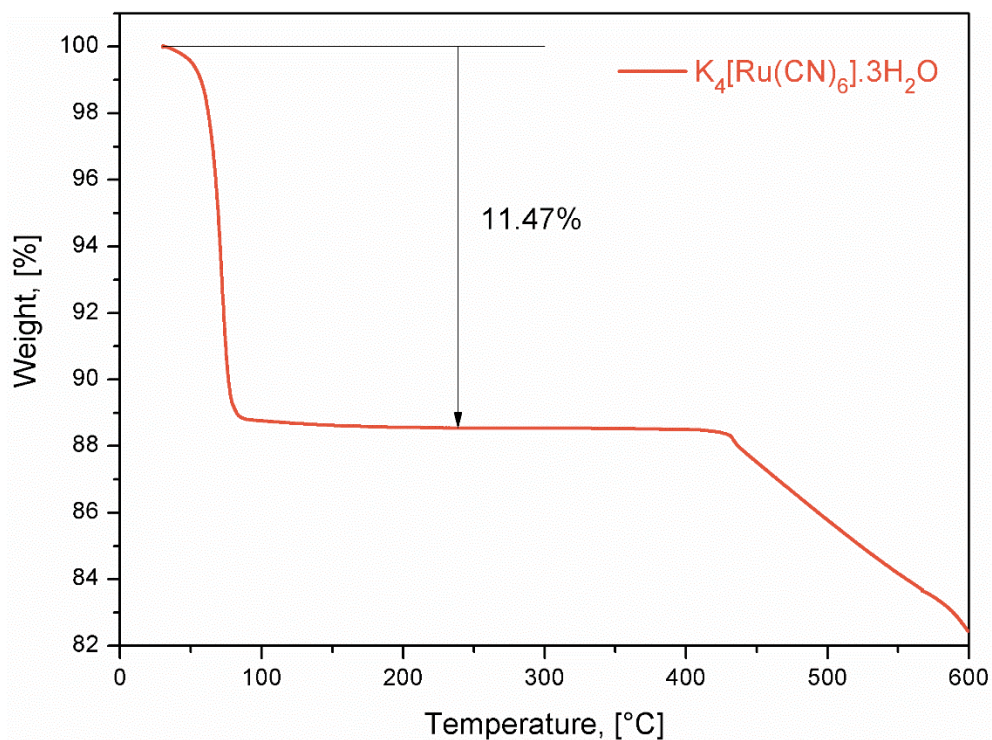

**Figure S19.** TG curve for the crystals of  $K_4[Ru(CN)_6].xH_2O$ . For all the samples under study TG data were recorded to obtain the number of water molecules per formula unit.



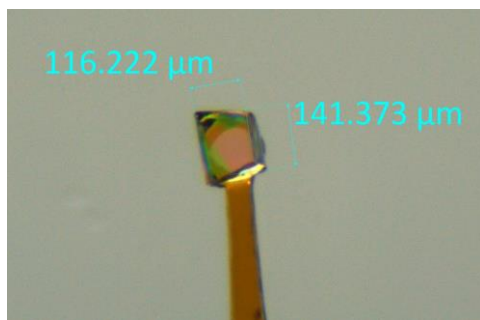

$K_3[Co(CN)_6]$

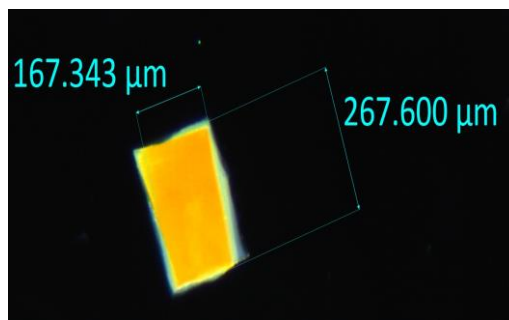

$K_4[Fe(CN)_6] \cdot 3H_2O$

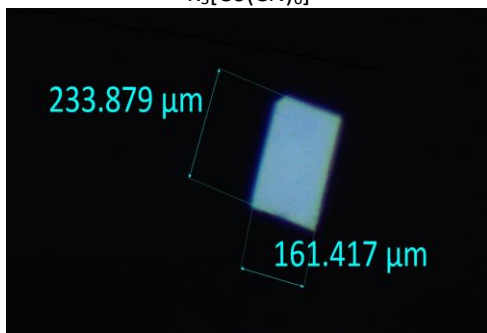

$K_4[Os(CN)_6] \cdot 3H_2O$

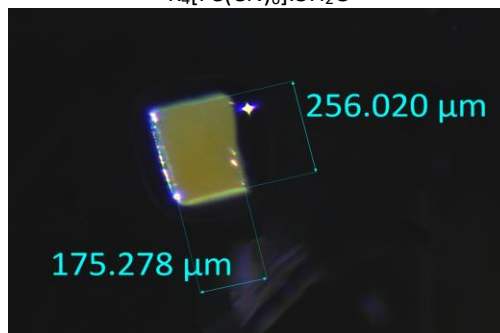

$K_4[Ru(CN)_6] \cdot 3H_2O$

**Figure S20.** Typical single crystal size used for the structural study.
